# Supplementary material for: Determination of Three Main Chlorogenic Acids in Water Extracts of Coffee Leaves by Liquid Chromatography Coupled to an Electrochemical Detector
Source: MDPI journal article supplement (doi:10.3390/antiox7100143), 2018-10-15
Supplement: s1 [file s1]

### Supplementary Material

## Determination of three main chlorogenic acids in water extracts of coffee leaves by liquid chromatography coupled to an electrochemical detector

Rocío Rodríguez-Gómez<sup>1</sup>, Jérôme Vanheuverzwijn<sup>1</sup>, Florence Souard<sup>1,2</sup>, Cédric Delporte<sup>1,4</sup>, Caroline Stevigny<sup>1</sup>, Piet Stoffelen<sup>3</sup>, Kris De Braekeleer<sup>1</sup>, Jean-Michel Kauffmann<sup>1\*</sup>

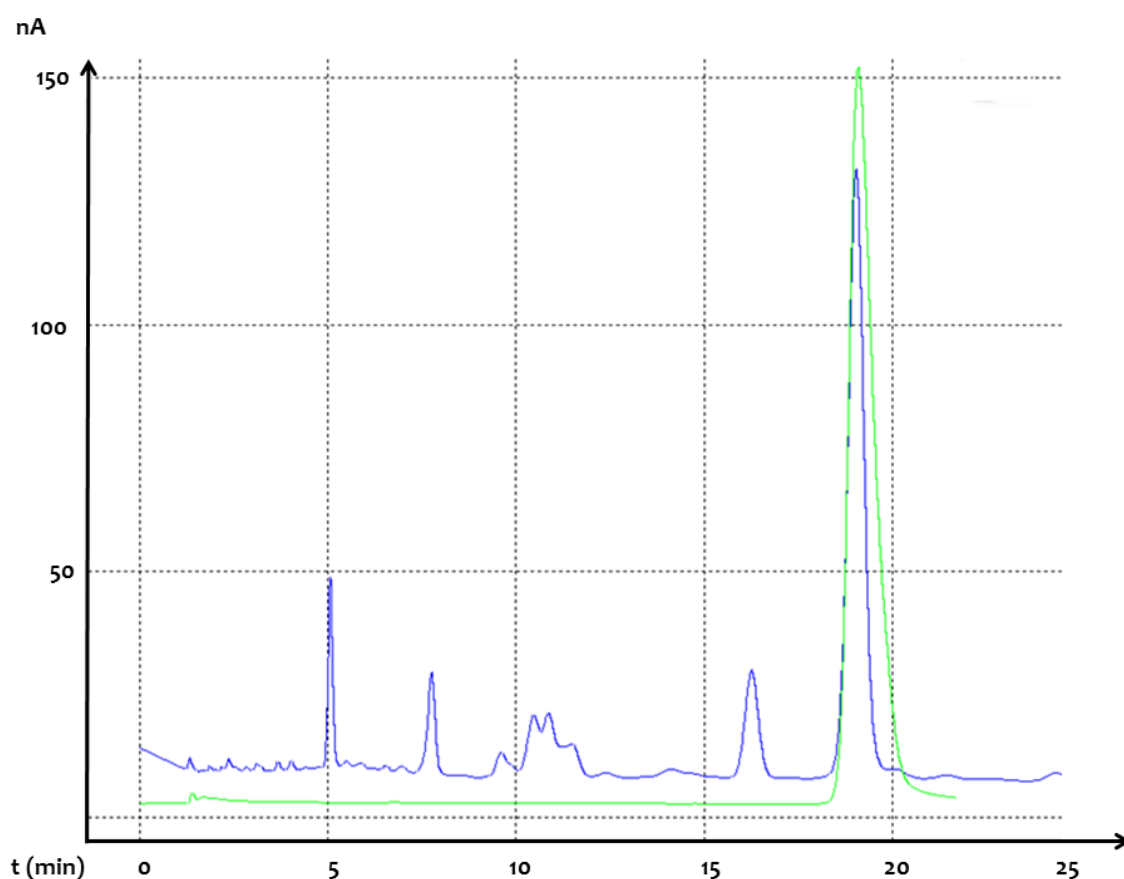

**Fig. S1.** Typical LC-EC chromatogram of *Coffea liberica var. liberica* and LC-EC chromatogram of standard solution of catechin. Blue chromatogram corresponds to *C. liberica var. liberica* and green chromatogram corresponds to standard solution of catechin ( $1 \times 10^{-4}$  M).

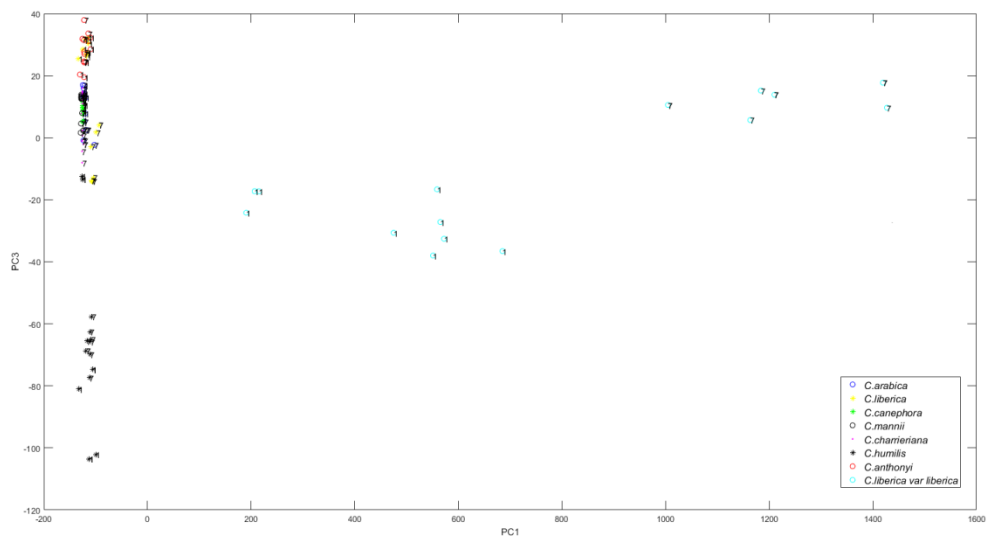

**Fig. S2.** Score plot obtained after PCA of the data matrix with all fingerprints due to species, and harvest period. PCA results after centering of dataset. PC1 *versus* PC3; PC1 = 90.3% and PC3 = 0.7%. Label (1) indicates January and label (7) indicates July.

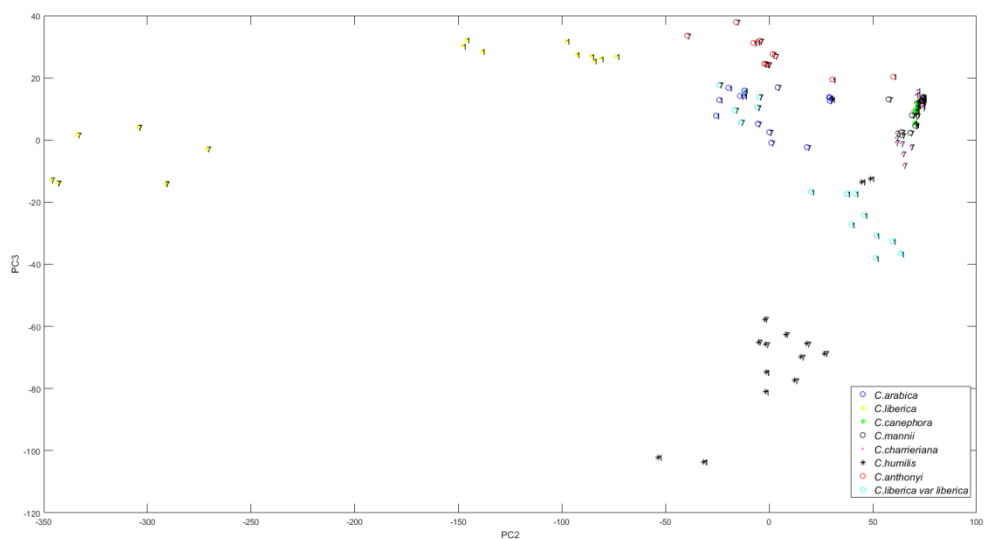

**Fig. S3.** Score plot obtained after PCA of the data matrix with all fingerprints due to species, and harvest period. PCA results after centering of dataset. PC2 *versus* PC3. PC2 = 7.1% and PC3 = 0.7%. Label (1) indicates January and label (7) indicates July.
